# Supplementary figures and images for: Association of Dietary Live Microbe Intake with Cardiovascular Disease in US Adults: A Cross-Sectional Study of NHANES 2007–2018
Source: MDPI journal article supplement (doi:10.3390/nu14224908), 2022-11-20

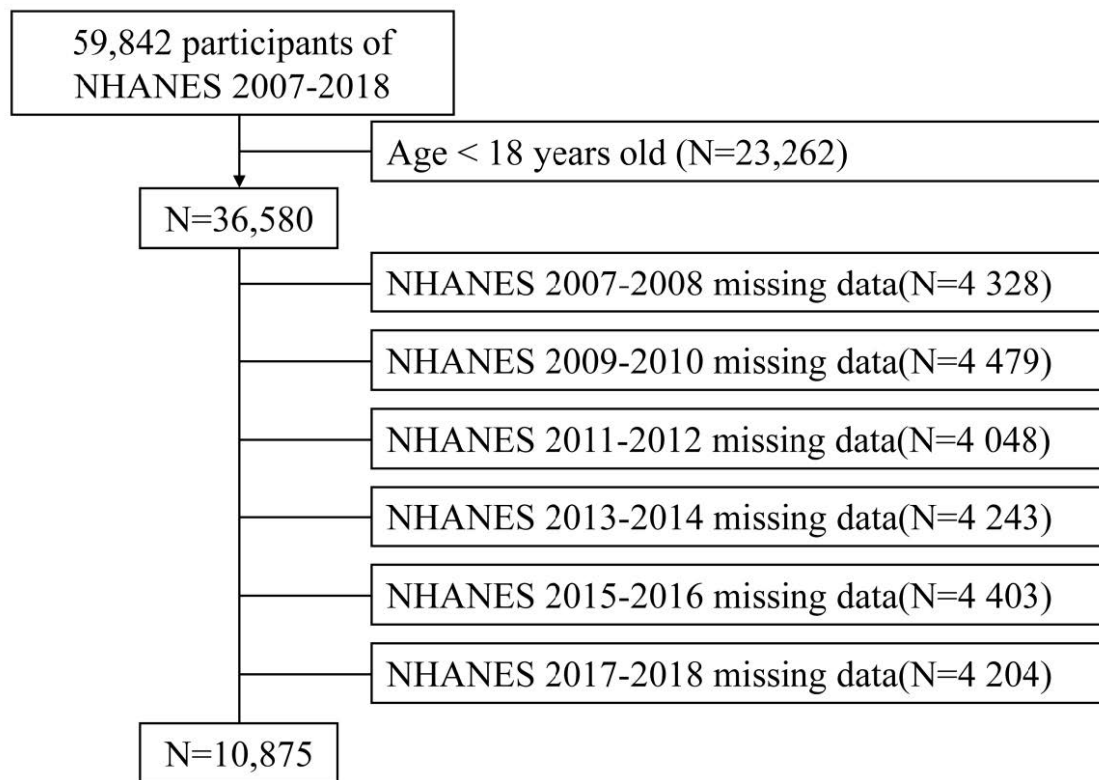

**Figure S1.** Flow chart of individuals with missing variables for each study year.

Supplement: s1 [file s1]
